# Supplementary material for: Automatic spread factor and position definition for UAV gateway through computational intelligence approach to maximize signal-to-noise ratio in wooded environments
Source: PeerJ journal article supplement (doi:10.7717/peerj-cs.2237), 2024-09-27

# Pareto: 7

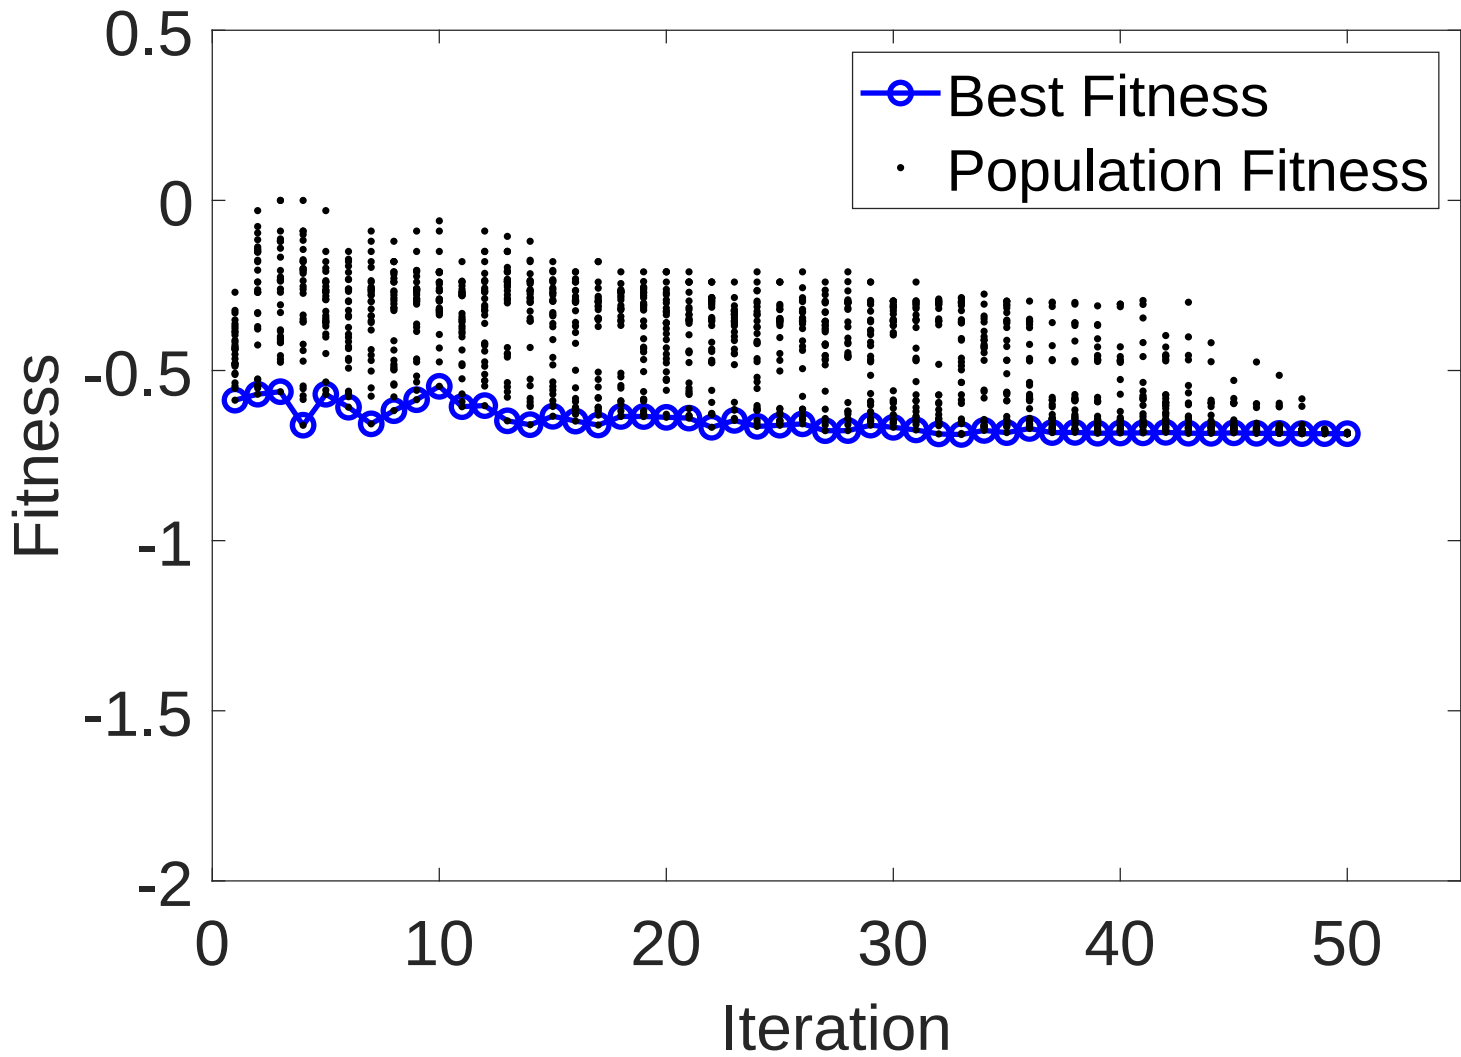

Supplement: peerJ_codes_and_data.zip [file peerJ_codes_and_data.zip]
